RESEARCH ARTICLE

# Bullying as a Risk for Poor Sleep Quality among High School Students in China

Ying Zhou<sup>1,3</sup>, Lan Guo<sup>1</sup>, Ci-yong Lu<sup>1\*</sup>, Jian-xiong Deng<sup>2</sup>, Yuan He<sup>1</sup>, Jing-hui Huang<sup>2</sup>, Guo-liang Huang<sup>2</sup>, Xue-qing Deng<sup>1</sup>, Xue Gao<sup>1</sup>

**1** Department of Medical Statistics and Epidemiology, School of Public Health, Sun Yat-sen University, Guangzhou, China, **2** Center for ADR monitoring of Guangdong, Guangzhou, China, **3** Center for Disease Control and Prevention of Haizhu District, Guangzhou, China

☉ These authors contributed equally to this work.

\* [luciyong@mail.sysu.edu.cn](mailto:luciyong@mail.sysu.edu.cn)

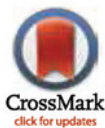

## Abstract

### Objective

To determine whether involvement in bullying as a bully, victim, or bully-victim was associated with a higher risk of poor sleep quality among high school students in China.

### Methods

A cross-sectional study was conducted. A total of 23,877 high school students were surveyed in six cities in Guangdong Province. All students were asked to complete the adolescent health status questionnaire, which included the Chinese version of the Pittsburgh Sleep Quality Index (PSQI) and bullying involvement. Descriptive statistics were used to evaluate sleep quality and the prevalence of school bullying. Multi-level logistic regression analyses were conducted to examine the association between being victimized and bullying others with sleep quality.

### Results

Among the 23,877 students, 6,127 (25.66%) reported having poor sleep quality, and 10.89% reported being involved in bullying behaviors. Of the respondents, 1,410 (5.91%) were pure victims of bullying, 401 (1.68%) were bullies and 784 (3.28%) were bully-victims. Frequently being involved in bullying behaviors (being bullied or bullying others) was related to increased risks of poor sleep quality compared with adolescents who were not involved in bullying behaviors. After adjusting for age, sex, and other confounding factors, the students who were being bullied (OR=2.05, 95%CI=1.81-2.32), bullied others (OR=2.30, 95%CI=1.85-2.86) or both (OR=2.58, 95%CI=2.20-3.03) were at a higher risk for poor sleep quality.

### Conclusions

Poor sleep quality among high school students is highly prevalent, and school bullying is prevalent among adolescents in China. The present results suggested that being involved in school bullying might be a risk factor for poor sleep quality among adolescents.

## OPEN ACCESS

**Citation:** Zhou Y, Guo L, Lu C-y, Deng J-x, He Y, Huang J-h, et al. (2015) Bullying as a Risk for Poor Sleep Quality among High School Students in China. PLoS ONE 10(3): e0121602. doi:10.1371/journal.pone.0121602

**Academic Editor:** Shahrad Taheri, Weill Cornell Medical College in Qatar, QATAR

**Received:** September 20, 2014

**Accepted:** February 13, 2015

**Published:** March 26, 2015

**Copyright:** © 2015 Zhou et al. This is an open access article distributed under the terms of the [Creative Commons Attribution License](https://creativecommons.org/licenses/by/4.0/), which permits unrestricted use, distribution, and reproduction in any medium, provided the original author and source are credited.

**Data Availability Statement:** All relevant data are within the paper.

**Funding:** This study was supported by Guangdong Food and Drug Administration. The funders had no role in study design, data collection and analysis, decision to publish, or preparation of the manuscript.

**Competing Interests:** The authors have declared that no competing interests exist.

## Introduction

High school students are special populations that endure a period of great challenges, risks and social developmental transitions. Numerous studies have confirmed the importance of sleep in behavioral regulation during the development of adolescents [1, 2]. Sleep quality is an important clinical construct and essential part of quality of life. Numerous studies have shown that poor sleep quality can place adolescents under the negative influences of impaired cognitive function, poor academic performance, depression, alcohol consumption, and suicidal behavior [3, 4]. Currently, poor sleep quality may be highly prevalent among high school students, and studies have shown that the number of adolescents involved in poor sleep quality worldwide varies between 18.7% and 25% [5–7]. However, the causes of poor sleep are complex and certainly multifactorial. Studies have reported that age, female sex, low socioeconomic status, living alone, and some environmental and occupational factors, as well as poor mental and psychological health, may be risk factors for having a sleep disorder [8–11].

Research has been undertaken that targets poor sleep quality among school students. The association between school behavior and sleep has been considered to be worth studying because school behavior may be strongly related to sleep and sleep problems. School bullying is a form of aggressive behavior experienced in schools that is defined as repeated exposure to negative actions by one or more schoolmates over time [12]. There are four profiles associated with bullying: pure bullies (students who bully and are never victims), pure victims (students who are victims of bullying and never attack others), bully-victims (students who are both victims of bullying and who bully others) and neutral (students never involved in bullying) [13]. Studies have shown that the number of students involved in this type of peer relationship in different countries varies between 6.3% and 45.2%, suggesting that bullying is prevalent among adolescents in schools [14, 15]. Numerous studies have shown that bullying affects the health of adolescents in the same way worldwide and appears to be linked to sleep quality [16, 17]. Williams *et al* found that children who were frequently bullied at school were more likely to get enuresis (OR = 1.7, 95%CI = 1.3–2.4) and have difficulty sleeping (OR = 3.6, 95% CI = 2.5–5.2) [18]. Previous studies have shown that the victims of bullying are more likely to have sleep difficulties among both women (OR = 1.47, 95% CI = 1.26–1.72) and men (OR = 1.58, 95%CI = 1.06–2.36) [19]; those victims also have a lower sleep quality [20] and more often use sleep medication [21] compared with non-bullied respondents. Another study [19, 22] showed that past exposure to bullying increased the risk of sleep disturbances among women (OR = 3.83, 95%CI = 3.12–4.70) and men (OR = 4.40, 95%CI = 3.35–5.78) in the workplace, after adjusting for covariates. These studies, however, were conducted on relatively small or selective samples, examined nonstandard measures for the assessment of sleep quality, or did not take adequate account of potential confounding factors such as socio-demographic factors. Furthermore, little is known about the sleep quality that may be associated with each bullying profile (pure victim, pure bully, bully-victim and neutral) among high school students.

In addition, most of the previous studies that measured sleep quality in China only used simple unstructured questions, which may be insufficient to deliver valid assessments of sleep quality. The Pittsburgh Sleep Quality Index (PSQI) was designed to evaluate sleep quality through 19 items on multiple dimensions of sleep over a 1-month period and has been proven to have good reliability and test-retest reliability [23]. It assesses seven aspects of sleep, including subjective sleep quality, sleep latency, sleep duration, habitual sleep efficiency, sleep disturbances, use of sleeping medication, and daytime dysfunction [24]. Examining several aspects of sleep simultaneously in the same sample could provide a more precise and exhaustive description of the different bullying profiles and the challenges faced by the students involved in bullying.

Currently, we do not know whether bullying behavior in high school is an independent risk factor for poor sleep quality among high school students. The present study was designed to fill this gap in knowledge. The present study explored the different aspects of sleep (e.g., duration, latency and habitual sleep efficiency) of the four bullying profiles (pure victim, pure bully, bully/victim and neutral) using the validated PSQI by determining whether students who experience frequent bullying behaviors in high school (as bullies, victims or both) are at risk for poor sleep quality.

Furthermore, the sample of previous studies about sleep quality in other countries ranged from 124 to 3906 [25]. Concerning the sleep quality status quo among adolescents and the relatively small sample of previous studies, the present study conduct a large-scale, randomly selected sample investigated the prevalence of school bullying and sleep quality among Chinese high school students.

## Methods

### Participants

A cross-sectional study was conducted to investigate the prevalence of school bullying and sleep quality among high school students. The participants were high school students recruited from six cities in the Guangdong Province through a three-stage stratified group sampling method. For the first stage, the cities were divided into three strata according to their economic level, and two cities were selected in each stratum. For the second stage, 12 schools (6 junior high schools, 4 senior high schools and 2 vocational high schools) were randomly selected from all the schools in each city. For the third stage, 2 classes were randomly selected from each grade in the selected schools. All students (a total of 25,655) in the selected classes were asked to participate in this study and provided informed consent voluntarily. A total of 23,877 valid questionnaires were collected, resulting in a valid rate of 93.36%.

### Data Collection

To protect the privacy of the students, anonymous questionnaires were administered by trained interviewers in the absence of the teachers (to avoid any potential information bias). The students were required to fill out the questionnaires during class time.

### Ethical Statement

This study received approval from the Sun Yat-Sen University, School of Public Health Institutional Review Board. All participants were fully informed of the purpose of the study and were invited to participate voluntarily. Written consents were obtained from each participant and their parents.

### Measures

**Demographic characteristics.** The demographic questionnaire elicited information on age, gender, grade, economic status, academic pressure, relationships with families, classmates and teachers, and smoking. Family economic status was measured by asking the student's perception of their family's current status (rated from good to bad). Academic pressure was captured by a single item based on the student's self-rating from low to high. Relationships with families, classmates and teachers were assessed based on the student's self-rating from good to poor. Smoking was assessed by asking, "Did you smoke at least one cigarette per week?"

**Sleep quality.** The students' sleep quality was measured by the Chinese version of PSQI, which consists of 19 items generating 7 components: subjective sleep quality; sleep latency; sleep

duration; habitual sleep efficiency; sleep disturbances; use of sleep medication; and daytime dysfunction. The CPSQI had been proven to have a good overall reliability and test-retest reliability. The CPSQI has a cutoff value of 7, with higher global scores indicating poorer sleep quality [24].

**Bullying behaviors.** There are four profiles associated with bullying: pure bullies (students who bully and are never victims), pure victims (students who are victims of bullying and never attack others), bully-victims (students who are both victims of bullying and who bully others) and neutral (students never involved in bullying). The questions about bullying and victimization consisted of 12 parts, with the answers given on a 3-point scale as follows: 1-never, 2-sometimes (one or two times) or 3-often (more than three times). Students reporting at least one bullying behavior with a frequency of “often” in the past 30 days were classified as bullies [26]. Victims were those who reported at least one victimization experience in the past 30 days with a frequency of “often.” Bully-victims met the criteria for being both a bully and a victim. All other students were labeled as neutral [27].

**Bullying questionnaire.** The questions about bullying and victimization consisted of 12 parts, with the answers given on a 3-point scale as follows: 1-never, 2-sometimes (one or two times) or 3-often (more than three times).

Bullying and victimization were assessed with parallel questions: “During the last 30 days have you ever been (a1) “hit, kicked, pushed, shoved around, or locked another student indoors?”; (b1) “made fun of or insulted?”; (c1) “excluded intentionally or prevented from participating?”; (d1) “made fun of with sexual jokes, comments or gestures?”; (e1) “blackmailed for money?” or (f1) “bullied in some other way?”. Question for bullying were as follows: Have you ever (a2) “hit, kicked, pushed, shoved around, or locked another student indoors?” (b2) “made fun of, or teased him or her in a hurtful way?” (c2) “excluded another student intentionally, or prevented another student from participating?” (d2) “made fun of with sexual jokes, comments or gestures to another students?” (e2) “blackmailed money from other students?” (f2) “bullied other students in some other way?”.

## Statistical analysis

The statistical analyses were conducted using SPSS 21.0 and SAS V.9.2. Descriptive analyses were used to describe the demographic characteristics and the prevalence of poor sleep quality and school bullying. The sleep quality differences between different groups were ascertained by a Chi-square test. Because our study used a multistage sampling method, the students were grouped into classes; therefore, they were not independent. Thus, multi-level logistic regression analyses were carried out to select the factors that may influence sleep quality. The GLMMIX procedure in SAS was used to fit the model in which classes were treated as clusters. A two-tailed *P*-value of less than 0.05 was considered significant for all tests.

## Results

### Descriptive characteristics of the participants by sleep quality

The descriptive characteristics of the participants by sleep quality are presented in [Table 1](#). Among the 23,877 students, the mean age was  $15.81 \pm 2.01$  years; 46.27% of the students were boys, and 48.61% were junior high school students. A total of 6,127 students (25.66%) were reported to be poor sleepers. Among the participants, 11.65% and 40.06% had a poor economic status and high academic pressure, respectively. The proportion of participants who had poor relationships with their families, classmates, and teachers were 15.49%, 2.98%, and 5.40%, respectively. A total of 5.38% of the participants were smokers.

A higher proportion of girls were poor sleepers (51.30% vs. 54.30%,  $p < 0.001$ ), and a higher proportion of senior high school students were poor sleepers (46.26% vs. 62.82%,  $p < 0.001$ ).

More poor sleepers suffered from poor economic statuses (9.84% vs. 16.89%,  $p < 0.001$ ) and high academic pressure (35.04% vs. 54.58%,  $p < 0.001$ ) and were involved in bullying (9.20% vs. 18.61%,  $p < 0.001$ ); less poor sleepers currently had good relationship with their families (80.48% vs. 67.10%,  $p < 0.001$ ), classmates (72.52% vs. 60.06%,  $p < 0.001$ ) and teachers (53.70% vs. 38.62%,  $p < 0.001$ ).

Victimization and bullying were prevalent among high school students. Of the total participants, 10.89% reported being involved in school bullying during the past 30 days, with 1,410 (5.91%) of the students reporting being bullied and 401 (1.68%) admitting to bullying others. A subset of 784 (3.28%) students was involved in both victimization and bullying. As we can observe in [Table 1](#), there were significant sleep quality differences among these different groups ( $p < 0.001$ ).

**Table 1. Descriptive characteristics of the participants by sleep quality (n, %).**

| Variable                     | Total        | Good sleep quality | Poor sleep quality | Chi-Square | p-value |
|------------------------------|--------------|--------------------|--------------------|------------|---------|
| Gender                       |              |                    |                    |            |         |
| Boy                          | 11049(46.27) | 8340(46.99)        | 2709(44.21)        | 16.259     | <0.001  |
| Girl                         | 12403(51.95) | 9076(51.13)        | 3327(54.30)        |            |         |
| Grade                        |              |                    |                    |            |         |
| Junior                       | 11606(48.61) | 9377(52.83)        | 2229(36.38)        | 500.388    | <0.001  |
| Senior                       | 12061(50.51) | 8212(46.26)        | 3849(62.82)        |            |         |
| Economic status              |              |                    |                    |            |         |
| Good                         | 6509(27.26)  | 5174(29.15)        | 1335(21.79)        | 285.335    | <0.001  |
| General                      | 14504(60.74) | 10771(60.68)       | 3733(60.93)        |            |         |
| Bad                          | 2781(11.65)  | 1746(9.84)         | 1035(16.89)        |            |         |
| Academic pressure            |              |                    |                    |            |         |
| Low                          | 3520(11.74)  | 2880(16.23)        | 640(10.45)         | 727.178    | <0.001  |
| Middle                       | 10767(45.09) | 8629(48.61)        | 2138(34.89)        |            |         |
| High                         | 9564(40.06)  | 6220(35.04)        | 3344(54.58)        |            |         |
| Relationship with families   |              |                    |                    |            |         |
| Good                         | 18397(77.05) | 14286(80.48)       | 4111(67.10)        | 562.180    | <0.001  |
| Average                      | 4125(17.28)  | 2740(15.44)        | 1385(22.60)        |            |         |
| Bad                          | 1312(5.49)   | 692(3.90)          | 620(10.12)         |            |         |
| Relationship with classmates |              |                    |                    |            |         |
| Good                         | 16552(69.32) | 12872(72.52)       | 3680(60.06)        | 371.842    | <0.001  |
| Average                      | 6533(27.36)  | 4401(24.79)        | 2132(34.80)        |            |         |
| Bad                          | 711(2.98)    | 410(2.31)          | 301(4.91)          |            |         |
| Relationship with teachers   |              |                    |                    |            |         |
| Good                         | 11897(49.83) | 9531(53.70)        | 2366(38.62)        | 535.645    | <0.001  |
| Average                      | 10619(44.47) | 7442(41.93)        | 3177(51.85)        |            |         |
| Bad                          | 1289(5.40)   | 722(4.07)          | 567(9.25)          |            |         |
| Smoking                      |              |                    |                    |            |         |
| Yes                          | 1284(5.38)   | 758(4.27)          | 526(8.58)          | 165.590    | <0.001  |
| No                           | 22204(92.99) | 16692(94.04)       | 5512(89.96)        |            |         |
| Bullying behaviors           |              |                    |                    |            |         |
| Victim                       | 1410(5.91)   | 828(4.66)          | 582(9.50)          | 524.092    | <0.001  |
| Bully                        | 401(1.68)    | 225(1.27)          | 176(2.87)          |            |         |
| Bully-victim                 | 784(3.28)    | 402(2.26)          | 382(6.23)          |            |         |
| Neutral                      | 21282(89.13) | 16295(91.80)       | 4987(81.39)        |            |         |

doi:10.1371/journal.pone.0121602.t001

**Table 2. Elements of sleep quality by involvement in bullying (n, %).**

| Elements of sleep quality        | Total        | Involvement in bullying | Neutral      | Chi-Square | p-value |
|----------------------------------|--------------|-------------------------|--------------|------------|---------|
| <b>Subjective sleep quality</b>  |              |                         |              |            |         |
| very good                        | 3282(13.75)  | 311(11.98)              | 2971(13.96)  | 481.162    | <0.001  |
| good                             | 12415(52.00) | 1009(38.88)             | 11406(53.59) |            |         |
| poor                             | 6878(28.81)  | 930(35.84)              | 5948(27.95)  |            |         |
| very poor                        | 1302(5.45)   | 345(13.29)              | 957(4.50)    |            |         |
| <b>Sleep latency</b>             |              |                         |              |            |         |
| ≤15 min                          | 9930(41.59)  | 824(31.75)              | 9106(42.79)  | 382.371    | <0.001  |
| 16~30 min                        | 8949(37.48)  | 888(34.22)              | 8061(37.88)  |            |         |
| 31~60 min                        | 3935(16.48)  | 621(23.93)              | 3314(15.57)  |            |         |
| ≥60 min                          | 1063(4.45)   | 262(10.10)              | 801(3.76)    |            |         |
| <b>Sleep duration</b>            |              |                         |              |            |         |
| >7 h                             | 9304(38.97)  | 818(31.52)              | 8486(39.87)  | 202.142    | <0.001  |
| 6~7 h                            | 8504(35.62)  | 878(33.83)              | 7626(35.83)  |            |         |
| 5~6 h                            | 4781(20.02)  | 631(24.32)              | 4150(19.50)  |            |         |
| <5 h                             | 1288(5.39)   | 268(10.33)              | 1020(4.79)   |            |         |
| <b>Habitual sleep efficiency</b> |              |                         |              |            |         |
| >85%                             | 21037(88.11) | 2160(83.24)             | 18877(88.70) | 95.189     | <0.001  |
| 75%~85%                          | 2027(8.49)   | 272(10.48)              | 1755(8.25)   |            |         |
| 65%~75%                          | 462(1.93)    | 85(3.28)                | 377(1.77)    |            |         |
| <65%                             | 351(1.47)    | 78(3.01)                | 273(1.28)    |            |         |
| <b>Sleep disturbance</b>         |              |                         |              |            |         |
| none                             | 5567(23.32)  | 386(14.87)              | 5181(24.34)  | 759.281    | <0.001  |
| mild                             | 16513(69.16) | 1703(65.63)             | 14810(69.59) |            |         |
| moderate                         | 1656(6.94)   | 429(16.53)              | 1227(5.77)   |            |         |
| severe                           | 141(0.59)    | 77(2.97)                | 64(0.30)     |            |         |
| <b>Use of sleep medication</b>   |              |                         |              |            |         |
| none                             | 23557(98.66) | 2496(96.18)             | 21061(98.96) | 253.808    | <0.001  |
| mild                             | 184(0.77)    | 28(1.08)                | 156(0.73)    |            |         |
| moderate                         | 50(0.21)     | 21(0.81)                | 29(0.14)     |            |         |
| severe                           | 86(0.36)     | 50(1.93)                | 36(0.17)     |            |         |
| <b>Daytime dysfunction</b>       |              |                         |              |            |         |
| none                             | 1715(7.18)   | 141(5.43)               | 1574(7.40)   | 506.644    | <0.001  |
| mild                             | 5915(24.77)  | 381(14.68)              | 5534(26.00)  |            |         |
| moderate                         | 11348(47.53) | 1125(43.35)             | 10223(48.04) |            |         |
| severe                           | 4899(20.52)  | 948(36.53)              | 3951(18.56)  |            |         |

doi:10.1371/journal.pone.0121602.t002

### Elements of sleep quality by involvement in bullying behaviors

Seven components of sleep quality in the present sample population are listed in [Table 2](#). Of the total participants, 25.66% of the students reported having poor sleep quality, 20.93% of the students reported sleep latencies over 30 minutes, 25.42% of the students reported sleep durations less than 6 hours, 75.66% of the students reported sleep disturbances, 1.34% of the students had used sleep medication and 92.82% of the students reported having dysfunction during the daytime.

As these results indicate, the seven elements of sleep quality varied widely between those who were involved in bullying and those who were neutral. The students who were involved in bullying behaviors (being bullied or bullying others) reported a poorer subjective sleep quality,

**Table 3. The frequency of bullying behaviors by sleep quality (n, %).**

| Bullying behaviors       | Total | Poor sleep quality | Good sleep quality | Chi-Square | p-value |
|--------------------------|-------|--------------------|--------------------|------------|---------|
| Physical Victimization   |       |                    |                    |            |         |
| never                    | 23207 | 5845(25.19)        | 17362(74.81)       |            |         |
| sometimes                | 411   | 145(35.28)         | 266(64.72)         | 123.382    | <0.001  |
| often                    | 259   | 137(52.93)         | 122(47.17)         |            |         |
| Verbal Victimization     |       |                    |                    |            |         |
| never                    | 18176 | 4131(22.73)        | 14045(77.27)       |            |         |
| sometimes                | 3067  | 899(29.31)         | 2168(70.69)        | 456.306    | <0.001  |
| often                    | 2634  | 1097(41.65)        | 1537(58.35)        |            |         |
| Relational Victimization |       |                    |                    |            |         |
| never                    | 22068 | 5363(24.30)        | 16705(75.70)       |            |         |
| sometimes                | 1240  | 464(37.42)         | 776(62.58)         | 329.697    | <0.001  |
| often                    | 569   | 300(52.72)         | 269(47.28)         |            |         |
| Physical Bullying        |       |                    |                    |            |         |
| never                    | 23243 | 5866(25.24)        | 17377(74.76)       |            |         |
| sometimes                | 412   | 144(34.95)         | 268(65.05)         | 105.926    | <0.001  |
| often                    | 222   | 117(52.70)         | 105(47.30)         |            |         |
| Verbal Bullying          |       |                    |                    |            |         |
| never                    | 20733 | 4941(23.83)        | 15792(76.17)       |            |         |
| sometimes                | 1707  | 555(32.51)         | 1152(67.49)        | 329.285    | <0.001  |
| often                    | 1437  | 631(43.91)         | 806(56.09)         |            |         |
| Relational Bullying      |       |                    |                    |            |         |
| never                    | 22832 | 5671(24.84)        | 17161(75.16)       |            |         |
| sometimes                | 712   | 284(39.89)         | 428(60.11)         | 201.573    | <0.001  |
| often                    | 333   | 172(51.65)         | 161(48.35)         |            |         |

doi:10.1371/journal.pone.0121602.t003

a longer sleep latency, a shorter sleep duration, less habitual sleep efficiency, more daytime dysfunction, an increased use of sleep medications and more sleep disturbances. The total measure of poor sleep quality occurred more frequently among the student who were bullied or bullies or both, and the differences were all significant.

### Frequency of bullying behaviors and poor sleep quality

The frequencies of different types of bullying behaviors (being bullied or bullying others) and total poor sleep quality are represented in [Table 3](#). In our study, 670 (2.81%) of the students reported being physically bullied at least once or twice in the past 30 days; 5,701 (23.88%) reported being verbally bullied; and 1,809 (7.58%) reported being relationally bullied. A total of 634 (2.66%) of the students reported physically bullying others at least once or twice in the past 30 days; 3,144 (13.17%) reported verbally bullying; and 1,045 (4.38%) reported relationally bullying.

The students, who were involved in bullying behavior, whether as victim or a bully, were at a significantly higher risk for poor sleep quality compared with students who were never victims or bullies. For example, the incidence of poor sleep quality among the students who were never physically bullied was 25.19%, while among the students who were sometimes physically bullied, the incidence was 35.28%; the incidence among those who were often physically bullied was 52.90%. A similar pattern was found among verbal victimization, relational victimization and different forms of bullying others. The more frequent the involvement in bullying behavior (whether as a victim or a bully), the more likely the student had poor sleep quality (Figs. [1](#) and [2](#)).

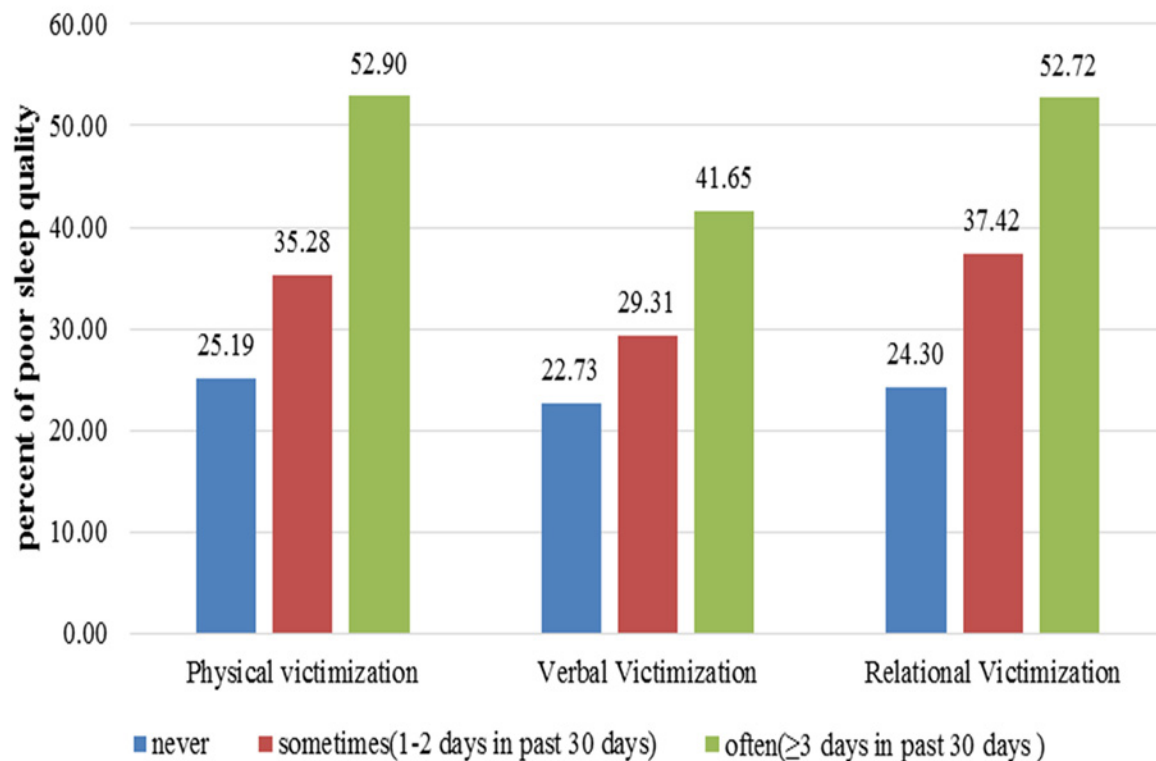

Figure 1. Frequency of different types of victimization and the poor sleep quality among high school students

**Fig 1. Frequency of different types of victimization and the poor sleep quality among high school students.**

doi:10.1371/journal.pone.0121602.g001

### Association of poor sleep quality and bullying behaviors

The final logistic regression model for poor sleep quality is presented in [Table 4](#). After adjusting for gender, grade, economic status, academic pressure, relationships with families, classmates and teachers, and smoking, the students who were being bullied (OR = 2.05, 95% CI = 1.81–2.32), bullied others (OR = 2.30, 95% CI = 1.85–2.86) and both (OR = 2.58, 95% CI = 2.20–3.03) were at a higher risk for poor sleep quality. In addition, we conducted regression analysis to examine odds ratios associated with involvement in bullying behaviors predicting sleep duration, sleep latency, etc. Finally, our results indicated that bullying others, being bullied and victim-bully predicted all aspects of the sleep quality, including sleep duration, sleep latency, etc ([Table 5](#)).

### Discussion

The current cross-sectional study used the validated PSQI to evaluate the sleep quality in adolescent bullying profiles with a large sampled population in China. We found that 10.89% of the students were involved in bullying behavior and that the overall prevalence of poor sleep quality (defined as PSQI >7) was 25.66%. Previous studies have showed that the number of students involved in school bullying in different countries varies between 6.3 and 45.2% [[15](#)] and that the prevalence of sleep problems varies from 10 to 33% [[28](#), [29](#)]. Our results are in agreement with the results of these studies showing that bullying is a widespread phenomenon [[25](#)] and that poor sleep quality is highly prevalent in the adolescents [[30](#)].



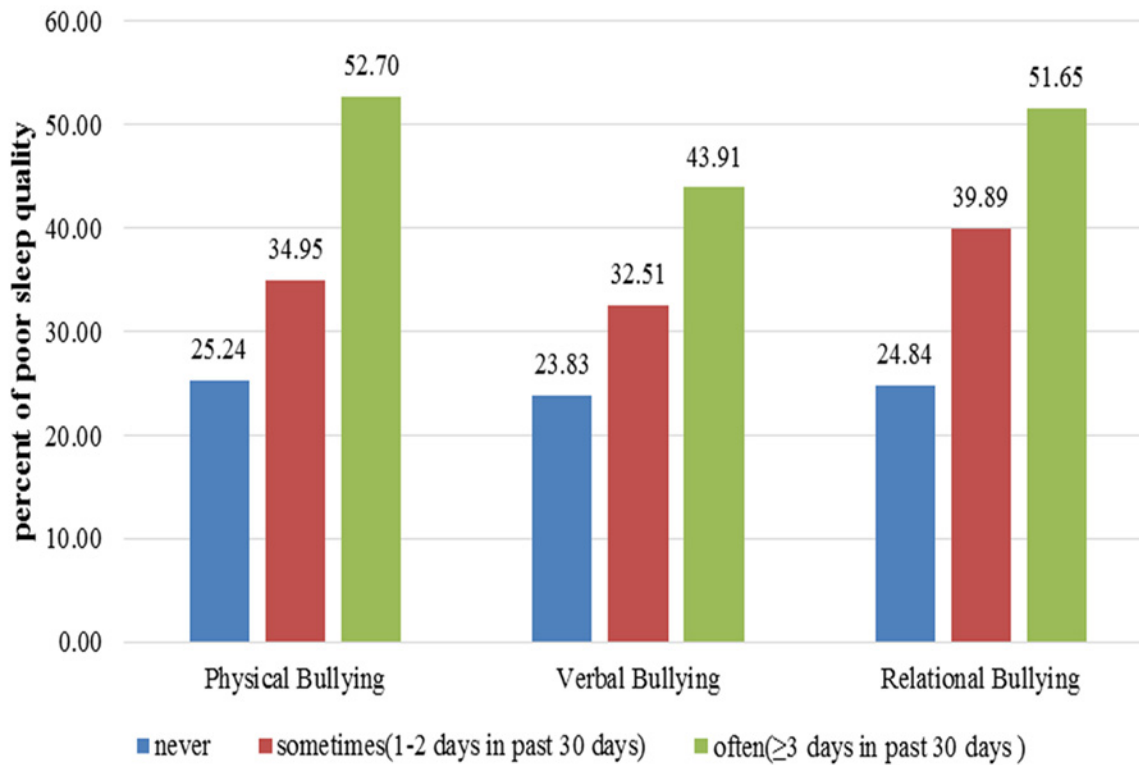

Figure 2. Frequency of different types of bullying and the poor sleep quality among high school students

**Fig 2. Frequency of different types of bullying and the poor sleep quality among high school students.**

doi:10.1371/journal.pone.0121602.g002

**Table 4. Association of the poor sleep quality and bullying behaviors.**

| Covariates                   |              | Reference | Adjusted OR | 95% CI    | p-value |
|------------------------------|--------------|-----------|-------------|-----------|---------|
| Gender                       | Girl         | Boy       | 1.32        | 1.23–1.41 | <0.001  |
| Grade                        | Junior       | Senior    | 1.91        | 1.79–2.04 | <0.001  |
| Economic status              | General      | Good      | 1.04        | 0.97–1.14 | 0.211   |
|                              | Bad          |           | 1.20        | 1.07–1.34 | 0.001   |
| Academic pressure            | Average      | Low       | 1.18        | 1.06–1.32 | 0.002   |
|                              | High         |           | 2.32        | 2.09–2.57 | <0.001  |
| Relationship with families   | Average      | Good      | 1.46        | 1.35–1.59 | <0.001  |
|                              | Bad          |           | 2.21        | 1.94–2.51 | <0.001  |
| Relationship with classmates | Average      | Good      | 1.29        | 1.19–1.39 | <0.001  |
|                              | Bad          |           | 1.23        | 1.02–1.34 | 0.017   |
| Relationship with teachers   | Average      | Good      | 1.31        | 1.22–1.41 | <0.001  |
|                              | Bad          |           | 2.00        | 1.73–2.30 | <0.001  |
| Smoking                      | Yes          | No        | 1.67        | 1.47–1.91 | <0.001  |
| Bullying behavior            | Victim       | Neutral   | 2.05        | 1.81–2.32 | <0.001  |
|                              | Bully        |           | 2.30        | 1.85–2.86 | <0.001  |
|                              | Bully-Victim |           | 2.58        | 2.20–3.03 | <0.001  |

Notes: Adjusted for gender; grade; economic status; academic pressure; relationship with families, classmates, and teachers; and smoking

doi:10.1371/journal.pone.0121602.t004

**Table 5. The regression of seven aspects of the sleep quality.**

|                           | Covariates   | Adjusted OR | 95%CI     | p-value |
|---------------------------|--------------|-------------|-----------|---------|
| Subjective sleep quality  | Victim       | 1.98        | 1.78–2.21 | <0.001  |
|                           | Bully        | 1.88        | 1.54–2.29 | <0.001  |
|                           | Victim-Bully | 2.15        | 1.86–2.48 | <0.001  |
| Sleep latency             | Victim       | 2.05        | 1.82–2.30 | <0.001  |
|                           | Bully        | 1.82        | 1.47–2.26 | <0.001  |
|                           | Victim-Bully | 2.54        | 2.19–2.95 | <0.001  |
| Sleep duration            | Victim       | 1.43        | 1.27–1.60 | <0.001  |
|                           | Bully        | 1.69        | 1.37–2.80 | <0.001  |
|                           | Victim-Bully | 2.11        | 1.81–2.44 | <0.001  |
| Habitual sleep efficiency | Victim       | 1.76        | 1.37–2.25 | <0.001  |
|                           | Bully        | 2.75        | 1.90–3.98 | <0.001  |
|                           | Victim-Bully | 2.49        | 1.88–3.30 | <0.001  |
| Sleep disturbances        | Victim       | 3.47        | 3.00–4.01 | <0.001  |
|                           | Bully        | 3.05        | 2.33–4.00 | <0.001  |
|                           | Victim-Bully | 4.68        | 3.93–5.58 | <0.001  |
| Use of sleep medication   | Victim       | 2.57        | 1.81–3.65 | <0.001  |
|                           | Bully        | 2.94        | 1.63–5.30 | <0.001  |
|                           | Victim-Bully | 6.49        | 4.74–8.90 | <0.001  |
| Daytime dysfunction       | Victim       | 1.85        | 1.62–2.11 | <0.001  |
|                           | Bully        | 1.71        | 1.35–2.16 | <0.001  |
|                           | Victim-Bully | 2.52        | 2.09–3.05 | <0.001  |

Notes: Reference covariate: Neutral

doi:10.1371/journal.pone.0121602.t005

After adjusting for age, sex, and other confounding factors, our finding showed that students who were being bullied (OR = 2.05, 95%CI = 1.81–2.32), bullied others (OR = 2.30, 95% CI = 1.85–2.86) or both (OR = 2.58, 95%CI = 2.20–3.03) were at a higher risk of poor sleep quality. In addition, our study found that more frequent exposure to bullying resulted in a higher risk of experiencing poor sleep quality. To date, few studies have examined the association between school bullying and sleep disturbances. The study by Kubiszewski *et al.* [31] showed that victims of bullying showed significantly more subjective sleep disturbances than the pure-bully or neutral groups in France, after controlling for the effects of gender and age. More recently, other studies have investigated the association between workplace bullying and sleep disturbances. Niedhammer *et al.* [22] found that the risk of poor sleep quality among those experiencing weekly (OR = 3.25, 95%CI = 2.27–4.66) and daily (OR = 6.34, 95% CI = 4.31–9.33) exposure to bullying was higher than those without exposure in the working population. Hansen *et al.* [32] found that those who were occasionally bullied had higher ORs of disturbed sleep (OR = 3.60, 95%CI = 1.31–9.86) and a poor quality of sleep (OR = 5.22, 95% CI = 1.69–16.0) compared with those who were not bullied. These studies all suggest that bullying is closely associated with poor sleep quality.

Our results showed that those who frequently bullied others reported a poorer sleep quality, which may be explained by the fact that sleep becomes disturbed by intrusive thoughts and ruminations before and after specific bullying episodes [33]. However, being a victim of bullying could also lead to poor sleep quality, which could be explained by alterations in the hypothalamic–pituitary–adrenal (HPA) axis that are produced by chronic stress related to bullying. The HPA axis is known to influence sleep [34].

A typical bully or victim is likely to experience difficulties in solving social problems and usually has negative attitudes and beliefs and poor interpersonal relationships [35]. Researchers have found an association between involvement in bullying and a number of social stresses and psychological symptoms, including depression, anxiety, fears of going to school, and feelings of being unsafe and unhappy at school [36–38]. In addition, students with chronic sleep problems usually report more negative emotional states such as feeling tired, tense, anxious, depressed, and inattentive and experiencing conduct disorder [39–42]. These social stresses show a strong association with sleep problems and greatly disturb sleep in adolescents, which may be a mechanism behind bullying and sleep difficulties [43]. Moreover, stressful situations may cause disturbed sleep and less refreshing sleep [44], which is an underlying mechanism that could involve a lack of self-confidence to address stressful situations and the use of ineffective coping strategies during peer confrontation [31]. In our society, the social stress experienced by victims of bullying could arouse powerful feelings of threat, and any perception of threat and the associated increased arousal will make it difficult to fall asleep and thereby decrease sleep quality [40]. Moreover, the alertness and stress response system increases significantly during adolescent development, which could lead adolescents to have a higher risk of bullying-related sleep impairments [31].

In the present study, there are some limitations that should be considered. First, the data that we collected were cross-sectional and can thus only be used to evaluate statistical relationships but not causation. Longitudinal research that further indicates the cause–result relation could be the focus of future studies. Second, the school bullying was self-reported, which may be subjectively biased and may over- or underestimate the associations between school bullying and sleep. Future studies should assess bullying behaviors using more objective measures. Finally, no details regarding specific time frame for demographic questions were in our questionnaire. We advocate that future investigation to give a specific time frame for demographic questions is recommended.

Despite these limitations, our results provided insight into the relationship between school bullying and sleep quality. While we cannot provide a determinate interpretation for this relationship, we can suggest several possibilities that could be benefited by future study. The findings are of potential practical importance both for parents who want to support their children's socio-emotional development and well-being and for educational professionals who must deal with the students involved in bullying.

## Conclusions

In conclusion, we investigated the prevalence of school bullying and sleep quality among Chinese high school students using a large-scale, randomly selected sample and examined the association between these factors. The results showed that the sleep quality of high school students is not optimistic and that school bullying is prevalent among adolescents in China. Additionally, being involved in school bullying might be a risk factor for poor sleep quality in adolescents. Given the prevalence of bullying observed in this study and its potential damage on sleep quality, effective preventive intervention measures should require a full consideration of the social and environmental factors that would stop bullying behaviors among Chinese adolescents.

## Acknowledgments

We gratefully acknowledge the contribution of Guangdong Food and Drug Administration, Guangdong Education Bureau and its participating schools.

## Author Contributions

Conceived and designed the experiments: C-YL YZ. Performed the experiments: C-YL YZ LG YH J-XD J-HH G-LH X-QD XG. Analyzed the data: C-YL YZ LG YH. Contributed reagents/materials/analysis tools: LG YH. Wrote the paper: C-YL YZ.

## References

1. Kamphuis J, Meerlo P, Koolhaas JM, Lancel M. Poor sleep as a potential causal factor in aggression and violence. *Sleep Med.* [Journal Article; Review]. 2012 2012-04-01; 13(4):327–34. doi: [10.1016/j.sleep.2011.12.006](https://doi.org/10.1016/j.sleep.2011.12.006) PMID: [22305407](https://pubmed.ncbi.nlm.nih.gov/22305407/)
2. Peach HD, Gaultney JF. Sleep, impulse control, and sensation-seeking predict delinquent behavior in adolescents, emerging adults, and adults. *J Adolesc Health.* [Journal Article; Research Support, N.I.H., Extramural]. 2013 2013-08-01; 53(2):293–9. doi: [10.1016/j.jadohealth.2013.03.012](https://doi.org/10.1016/j.jadohealth.2013.03.012) PMID: [23672770](https://pubmed.ncbi.nlm.nih.gov/23672770/)
3. Williams PG, Cribbet MR, Rau HK, Gunn HE, Czajkowski LA. The effects of poor sleep on cognitive, affective, and physiological responses to a laboratory stressor. *Ann Behav Med.* [Journal Article]. 2013 2013-08-01; 46(1):40–51. doi: [10.1007/s12160-013-9482-x](https://doi.org/10.1007/s12160-013-9482-x) PMID: [23504562](https://pubmed.ncbi.nlm.nih.gov/23504562/)
4. Liu X, Buysse DJ. Sleep and youth suicidal behavior: a neglected field. *Curr Opin Psychiatry.* [Journal Article; Research Support, N.I.H., Extramural; Review]. 2006 2006-05-01; 19(3):288–93. PMID: [16612215](https://pubmed.ncbi.nlm.nih.gov/16612215/)
5. Huang YS, Wang CH, Guilleminault C. An epidemiologic study of sleep problems among adolescents in North Taiwan. *Sleep Med.* [Journal Article; Research Support, Non-U.S. Gov't]. 2010 2010-12-01; 11(10):1035–42. doi: [10.1016/j.sleep.2010.04.009](https://doi.org/10.1016/j.sleep.2010.04.009) PMID: [20724214](https://pubmed.ncbi.nlm.nih.gov/20724214/)
6. Ohayon M, Roberts R, Zulley J. Prevalence and Patterns of Problematic Sleep Among Older Adolescents.; 2000. PMID: [11128333](https://pubmed.ncbi.nlm.nih.gov/11128333/)
7. Chung KF, Cheung MM. Sleep-wake patterns and sleep disturbance among Hong Kong Chinese adolescents. *Sleep.* [Journal Article]. 2008 2008-02-01; 31(2):185–94. PMID: [18274265](https://pubmed.ncbi.nlm.nih.gov/18274265/)
8. Doi Y, Minowa M, Tango T. Impact and correlates of poor sleep quality in Japanese white-collar employees. *Sleep.* [Journal Article; Research Support, Non-U.S. Gov't]. 2003 2003-06-15; 26(4):467–71. PMID: [12841374](https://pubmed.ncbi.nlm.nih.gov/12841374/)
9. Eriksen W, Bjorvatn B, Bruusgaard D, Knardahl S. Work factors as predictors of poor sleep in nurses' aides. *Int Arch Occup Environ Health.* [Journal Article; Research Support, Non-U.S. Gov't]. 2008 2008-01-01; 81(3):301–10. PMID: [17605031](https://pubmed.ncbi.nlm.nih.gov/17605031/)
10. Nakata A, Haratani T, Takahashi M, Kawakami N, Arito H, Kobayashi F, et al. Job stress, social support, and prevalence of insomnia in a population of Japanese daytime workers. *Soc Sci Med.* [Journal Article; Research Support, Non-U.S. Gov't]. 2004 2004-10-01; 59(8):1719–30. PMID: [15279928](https://pubmed.ncbi.nlm.nih.gov/15279928/)
11. Akerstedt T, Knutsson A, Westerholm P, Theorell T, Alfredsson L, Kecklund G. Sleep disturbances, work stress and work hours: a cross-sectional study. *J Psychosom Res.* [Journal Article; Research Support, Non-U.S. Gov't]. 2002 2002-09-01; 53(3):741–8. PMID: [12217447](https://pubmed.ncbi.nlm.nih.gov/12217447/)
12. Olweus D, Limber SP. Bullying in school: evaluation and dissemination of the Olweus Bullying Prevention Program. *Am J Orthopsychiatry.* [Evaluation Studies; Journal Article; Research Support, Non-U.S. Gov't]. 2010 2010-01-01; 80(1):124–34. doi: [10.1111/j.1939-0025.2010.01015.x](https://doi.org/10.1111/j.1939-0025.2010.01015.x) PMID: [20397997](https://pubmed.ncbi.nlm.nih.gov/20397997/)
13. Kubiszewski V, Fontaine R, Potard C, Gimenes G. Bullying, sleep/wake patterns and subjective sleep disorders: findings from a cross-sectional survey. *Chronobiol Int.* [Journal Article; Multicenter Study]. 2014 2014-05-01; 31(4):542–53. doi: [10.3109/07420528.2013.877475](https://doi.org/10.3109/07420528.2013.877475) PMID: [24417522](https://pubmed.ncbi.nlm.nih.gov/24417522/)
14. Wang J, Iannotti RJ, Nansel TR. School bullying among adolescents in the United States: physical, verbal, relational, and cyber. *J Adolesc Health.* [Journal Article; Research Support, N.I.H., Extramural; Research Support, N.I.H., Intramural]. 2009 2009-10-01; 45(4):368–75. doi: [10.1016/j.jadohealth.2009.03.021](https://doi.org/10.1016/j.jadohealth.2009.03.021) PMID: [19766941](https://pubmed.ncbi.nlm.nih.gov/19766941/)
15. Craig W, Harel-Fisch Y, Fogel-Grinvald H, Dostaler S, Hetland J, Simons-Morton B, et al. A cross-national profile of bullying and victimization among adolescents in 40 countries. *International Journal of Public Health.* 2009; 54(S2):216–24. doi: [10.1007/s00038-009-5413-9](https://doi.org/10.1007/s00038-009-5413-9) PMID: [19623475](https://pubmed.ncbi.nlm.nih.gov/19623475/)
16. Hansen TB, Steenberg LM, Palic S, Elklit A. A review of psychological factors related to bullying victimization in schools. *Aggression and Violent Behavior.* 2012; 17(4):383–7.
17. Harel-Fisch Y, Walsh SD, Fogel-Grinvald H, Amitai G, Pickett W, Molcho M, et al. Negative school perceptions and involvement in school bullying: a universal relationship across 40 countries. *J Adolesc.* [Journal Article]. 2011 2011-08-01; 34(4):639–52. doi: [10.1016/j.adolescence.2010.09.008](https://doi.org/10.1016/j.adolescence.2010.09.008) PMID: [21168202](https://pubmed.ncbi.nlm.nih.gov/21168202/)

18. Williams K, Chambers M, Logan S, Robinson D. Association of common health symptoms with bullying in primary school children. *BMJ*. [Journal Article; Research Support, Non-U.S. Gov't]. 1996 1996-07-06; 313(7048):17–9. PMID: [8664762](#)
19. Lallukka T, Rahkonen O, Lahelma E. Workplace bullying and subsequent sleep problems—the Helsinki Health Study. *Scand J Work Environ Health*. [Journal Article; Research Support, Non-U.S. Gov't]. 2011 2011-05-01; 37(3):204–12. doi: [10.5271/sjweh.3137](#) PMID: [21116599](#)
20. Notelaers G, Einarsen S, De Witte H, Vermunt JK. Measuring exposure to bullying at work: The validity and advantages of the latent class cluster approach. *Work & Stress*. 2006; 20(4):289–302.
21. Vartia MA. Consequences of workplace bullying with respect to the well-being of its targets and the observers of bullying. *Scand J Work Environ Health*. [Comparative Study; Journal Article]. 2001 2001-02-01; 27(1):63–9. PMID: [11266149](#)
22. Niedhammer I, David S, Degioanni S, Drummond A, Philip P, Acquarone D, et al. Workplace bullying and sleep disturbances: findings from a large scale cross-sectional survey in the French working population. *Sleep*. [Journal Article; Research Support, Non-U.S. Gov't]. 2009 2009-09-01; 32(9):1211–9. PMID: [19750926](#)
23. Xu Z, Su H, Zou Y, Chen J, Wu J, Chang W. Sleep quality of Chinese adolescents: distribution and its associated factors. *J Paediatr Child Health*. [Journal Article; Research Support, Non-U.S. Gov't]. 2012 2012-02-01; 48(2):138–45. doi: [10.1111/j.1440-1754.2011.02065.x](#) PMID: [21470332](#)
24. Tsai PS, Wang SY, Wang MY, Su CT, Yang TT, Huang CJ, et al. Psychometric evaluation of the Chinese version of the Pittsburgh Sleep Quality Index (CPSQI) in primary insomnia and control subjects. *Qual Life Res*. [Journal Article; Validation Studies]. 2005 2005-10-01; 14(8):1943–52. PMID: [16155782](#)
25. Gini G, Pozzoli T. Association between bullying and psychosomatic problems: a meta-analysis. *Pediatrics*. [Journal Article; Meta-Analysis]. 2009 2009-03-01; 123(3):1059–65. doi: [10.1542/peds.2008-1215](#) PMID: [19255040](#)
26. Guo QZ, Ma WJ, Nie SP, Xu YJ, Xu HF, Zhang YR. Relationships between weight status and bullying victimization among school-aged adolescents in Guangdong Province of China. *Biomed Environ Sci*. [Journal Article; Research Support, Non-U.S. Gov't]. 2010 2010-04-01; 23(2):108–12. doi: [10.1016/S0895-3988\(10\)60039-6](#) PMID: [20514985](#)
27. Wang H, Zhou X, Lu C, Wu J, Deng X, Hong L, et al. Adolescent Bullying Involvement and Psychosocial Aspects of Family and School Life: A Cross-Sectional Study from Guangdong Province in China. *PLoS ONE*. 2012 2012-07-18; 7(7):e38619. doi: [10.1371/journal.pone.0038619](#) PMID: [22815693](#)
28. Fricke-Oerkemann L, Pluck J, Schredl M, Heinz K, Mitschke A, Wiater A, et al. Prevalence and course of sleep problems in childhood. *Sleep*. [Journal Article; Research Support, Non-U.S. Gov't]. 2007 2007-10-01; 30(10):1371–7. PMID: [17969471](#)
29. Liu X, Zhou H. Sleep duration, insomnia and behavioral problems among Chinese adolescents. *Psychiatry Res*. [Journal Article; Research Support, Non-U.S. Gov't]. 2002 2002-08-05; 111(1):75–85. PMID: [12140122](#)
30. Xianchen Liu ZCJ. Sleep Patterns and Problems Among Chinese Adolescents.; 2008. doi: [10.1542/peds.2007-1464](#) PMID: [18519486](#)
31. Kubiszewski V, Fontaine R, Potard C, Gimenes G. Bullying, sleep/wake patterns and subjective sleep disorders: findings from a cross-sectional survey. *Chronobiol Int*. [Journal Article]. 2014 2014-05-01; 31(4):542–53. doi: [10.3109/07420528.2013.877475](#) PMID: [24417522](#)
32. Hansen ÅM, Høgh A, Garde AH, Persson R. Workplace bullying and sleep difficulties: a 2-year follow-up study. *Int Arch Occ Env Hea*. 2014; 87(3):285–94. doi: [10.1007/s00420-013-0860-2](#) PMID: [23460184](#)
33. O'Moore M, Crowley N. The clinical effects of workplace bullying: a critical look at personality using SEM. *International Journal of Workplace Health Management*. 2011; 4(1):67–83.
34. Alfano CA, Zakem AH, Costa NM, Taylor LK, Weems CF. Sleep problems and their relation to cognitive factors, anxiety, and depressive symptoms in children and adolescents. *Depress Anxiety*. [Journal Article; Research Support, N.I.H., Extramural]. 2009 2009-01-20; 26(6):503–12. doi: [10.1002/da.20443](#) PMID: [19067319](#)
35. Cook CR, Williams KR, Guerra NG, Kim TE, Sadek S. Predictors of bullying and victimization in childhood and adolescence: A meta-analytic investigation.; 2010. p. 65–83.
36. Boulton MJ, Underwood K. Bully/victim problems among middle school children. *Br J Educ Psychol*. [Journal Article; Research Support, Non-U.S. Gov't]. 1992 1992-02-01; 62 (Pt 1):73–87. PMID: [1558813](#)
37. Brunstein KA, Marrocco F, Kleinman M, Schonfeld IS, Gould MS. Bullying, depression, and suicidality in adolescents. *J Am Acad Child Adolesc Psychiatry*. [Journal Article; Research Support, N.I.H., Extramural]. 2007 2007-01-01; 46(1):40–9. PMID: [17195728](#)

38. Gladstone GL, Parker GB, Malhi GS. Do bullied children become anxious and depressed adults?: A cross-sectional investigation of the correlates of bullying and anxious depression. *J Nerv Ment Dis*. [Comparative Study; Journal Article; Research Support, Non-U.S. Gov't]. 2006 2006-03-01; 194(3): 201–8. PMID: [16534438](#)
39. Feng Q, Zhang Q, Du Y, Ye Y, He Q. Associations of Physical Activity, Screen Time with Depression, Anxiety and Sleep Quality among Chinese College Freshmen. *PLoS ONE*. 2014 2014-06-25; 9(6): e100914. doi: [10.1371/journal.pone.0100914](#) PMID: [24964250](#)
40. Dahl RE, Lewin DS. Pathways to adolescent health sleep regulation and behavior. *J Adolesc Health*. [Journal Article; Review]. 2002 2002-12-01; 31(6 Suppl):175–84. PMID: [12470913](#)
41. Ohayon MM, Roth T. Place of chronic insomnia in the course of depressive and anxiety disorders. *J Psychiatr Res*. [Comparative Study; Journal Article; Research Support, Non-U.S. Gov't]. 2003 2003-01-01; 37(1):9–15. PMID: [12482465](#)
42. Lazaratou H, Dikeos DG, Anagnostopoulos DC, Sbokou O, Soldatos CR. Sleep problems in adolescence. A study of senior high school students in Greece. *Eur Child Adolesc Psychiatry*. [Journal Article]. 2005 2005-07-01; 14(4):237–43. PMID: [15981135](#)
43. Dahl RE, Lewin DS. Pathways to adolescent health sleep regulation and behavior. *J Adolesc Health*. [Journal Article; Review]. 2002 2002-12-01; 31(6 Suppl):175–84. PMID: [12470913](#)
44. Oz AR, Notelaers G, Moreno-Jiménez B. Workplace Bullying and Sleep Quality: The Mediating Role of Worry and Need for Recovery. *Psicología Conductual*. 2011; 19(2):453.
